# Supplementary material for: Nanoemulsion-induced enzymatic crosslinking of tyramine-functionalized polymer droplets
Source: Royal Society of Chemistry journal article supplement (doi:10.1039/c7tb00686a), 2017-01-01
Supplement: c7tb00686a1.pdf [file c7tb00686a1.pdf]

## Supporting Information

### Nanoemulsion-induced Enzymatic Crosslinking of Tyramine-functionalized Polymer Droplets

*Tom Kamperman<sup>†</sup>, Sieger Henke<sup>†</sup>, Bram Zoetebier, Niels Ruiterkamp, Rong Wang, Behdad Pouran, Harrie Weinans, Marcel Karperien\*, and Jeroen Leijten\**

<sup>†</sup> TK and SH contributed equally to this work

\* JL and MK are shared senior author

Content: Figure S1, S2

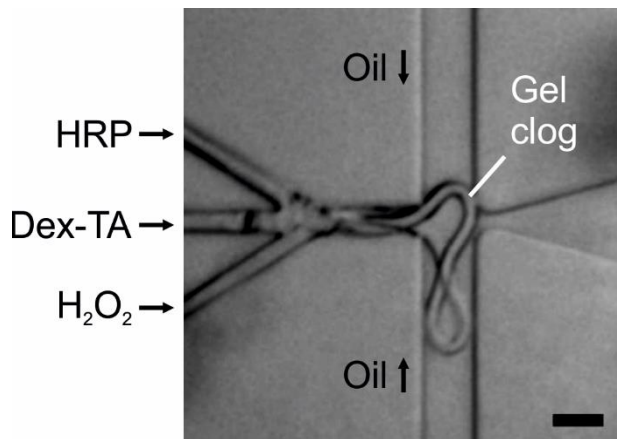

**Figure S1.** Mixing HRP, Dex-TA, and H<sub>2</sub>O<sub>2</sub> typically results in clogging of the microfluidic droplet generator, thereby hampering its further use for hydrogel microparticle production.

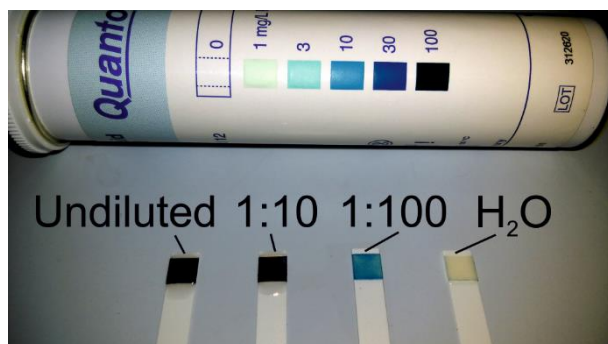

**Figure S2.** H<sub>2</sub>O<sub>2</sub>/oil nanoemulsion contained ~1 g/l H<sub>2</sub>O<sub>2</sub>, as determined using a 100x diluted emulsion on a quantitative peroxide color indicator strip.
